# Supplementary material for: Effect of Harvest Year and Altitude on Nutritional and Biometric Characteristics of Blueberry Cultivars
Source: Hindawi journal article supplement (doi:10.1155/2016/8648609), 2016-01-01
Supplement: f1 [file 8648609.f1.pdf]

**Table 1 - Supporting Information**

**Table 1.** - Harvesting Information of four blueberry (*Vaccinium corymbosum* L.) cultivars.

| Year | Altitude | Cultivars             |                       |                       |                       |
|------|----------|-----------------------|-----------------------|-----------------------|-----------------------|
|      |          | Duke                  | Bluecrop              | Goldtraube            | Ozarkblue             |
| 2011 | Low      | 07 <sup>th</sup> June | 07 <sup>th</sup> June | -                     | 27 <sup>th</sup> June |
|      | High     | 29 <sup>th</sup> June | 29 <sup>th</sup> June | 29 <sup>th</sup> June | 6 <sup>th</sup> July  |
| 2012 | Low      | 16 <sup>th</sup> May  | 16 <sup>th</sup> May  | -                     | 16 <sup>th</sup> May  |
|      | High     | 13 <sup>rd</sup> June | 13 <sup>rd</sup> June | 6 <sup>th</sup> June  | 6 <sup>th</sup> June  |
| 2013 | Low      | 25 <sup>th</sup> June | 25 <sup>th</sup> June | -                     | 02 <sup>nd</sup> July |
|      | High     | 16 <sup>th</sup> July | 16 <sup>th</sup> July | 16 <sup>th</sup> July | 23 <sup>rd</sup> July |
